# Supplementary material for: Mutual and Opposing Responses of Carabid Beetles and Predatory Wasps to Local and Landscape Factors in Vineyards
Source: Insects. 2020 Oct 30;11(11):746. doi: 10.3390/insects11110746 (PMC7693422; doi:10.3390/insects11110746)
Supplement: Supplementary file 1 [file insects-11-00746-s001.xlsx]

## Sheet: SpeciesData
Site_ID	Block	Farming_Type	CarSpecNr	CarAbu	WaspSpecNr	WaspAbu	Acu_int	Acu_mer	Ama_aen	Ama_ant	Ama_con	Ama_fam	Ama_lun	Ama_ova	Ama_sim	Anc_dor	Ani_bin	Asa_fla	Bad_bul	Bad_sod	Bem_lam	Bem_pro	Bem_qua	Bra_cre	Bra_exp	Cal_lun	Car_aur	Car_mon	Cic_cam	Har_aff	Har_atr	Har_dim	Har_dis	Har_pum	Har_sub	Har_tar	Lei_spi	Mic_mau	Mic_min	Neb_bre	Neb_sal	Not_aes	Oph_azu	Pla_dor	Poe_cup	Sem_sig	All_rossi	Anc_antil	Anc_clari
11	A	organic	16	88	3	11	2	0	15	3	0	0	0	2	0	0	0	0	0	0	0	0	0	0	3	0	1	0	0	3	0	1	10	4	0	17	0	0	10	10	0	1	5	1	0	0	0	9	1
12	A	conventional	11	52	3	14	0	0	15	0	0	0	0	0	0	0	0	0	0	0	0	0	0	0	3	0	0	0	0	2	0	1	2	4	0	4	0	0	11	5	0	2	3	0	0	0	0	0	1
13	B	organic	13	29	1	2	0	1	5	0	0	0	0	2	1	0	0	0	0	0	1	0	0	0	3	0	0	0	0	2	0	5	1	0	0	1	0	0	5	1	0	0	1	0	0	0	0	0	0
14	B	conventional	11	40	5	25	0	0	4	0	0	0	0	0	0	0	0	0	0	0	0	0	0	0	1	0	0	0	0	9	0	2	3	0	0	5	0	1	0	10	0	1	3	0	0	1	1	0	0
15	C	organic	12	86	4	8	0	0	7	1	0	0	0	0	0	0	0	0	0	0	0	0	0	0	13	0	0	0	0	1	0	0	2	0	0	2	0	0	6	44	7	1	0	1	1	0	0	3	0
16	C	conventional	9	90	3	7	2	0	22	0	0	0	0	0	1	0	0	0	0	0	0	0	0	0	14	0	0	0	0	4	0	0	13	0	0	1	0	0	4	29	0	0	0	0	0	0	0	0	0
17	D	organic	9	27	1	5	0	0	5	5	0	0	0	1	0	0	0	0	0	1	0	0	0	0	8	0	0	0	0	0	0	0	0	0	0	4	1	0	0	1	0	0	0	0	1	0	0	0	0
18	D	conventional	12	55	NA	NA	0	2	10	0	0	0	1	1	0	0	0	0	0	0	0	0	0	0	18	0	1	0	0	3	0	0	9	0	0	0	0	0	1	6	0	0	1	0	2	0	NA	NA	NA
19	F	organic	8	11	1	10	0	0	1	0	1	0	0	1	0	0	0	0	0	0	0	0	0	0	0	0	0	0	0	2	0	2	0	0	0	0	0	1	2	1	0	0	0	0	0	0	0	0	0
20	F	conventional	7	29	3	8	0	0	3	0	0	0	0	0	0	0	0	0	1	0	0	0	0	0	0	0	0	0	0	10	0	0	6	0	0	0	0	0	0	7	0	0	1	1	0	0	0	0	0
21	G	organic	2	2	1	3	0	0	0	0	0	0	0	0	0	0	0	0	0	0	0	0	0	1	0	0	0	0	0	0	0	1	0	0	0	0	0	0	0	0	0	0	0	0	0	0	0	0	3
22	G	conventional	10	26	2	3	0	0	6	0	0	0	0	1	0	0	0	0	0	0	0	0	0	1	0	0	0	0	0	1	0	3	8	0	0	0	1	2	0	1	0	0	2	0	0	0	0	0	0
23	H	organic	12	24	1	2	0	0	1	0	0	1	0	0	0	0	0	0	0	0	0	0	0	1	1	1	0	0	0	3	0	3	0	1	0	1	0	6	3	0	0	0	2	0	0	0	0	0	0
24	H	conventional	12	50	0	1	0	0	13	0	0	0	0	0	0	0	0	0	0	0	0	0	0	0	7	0	0	0	1	5	0	0	1	2	0	6	1	6	0	3	2	0	3	0	0	0	0	0	0
25	I	organic	14	43	0	0	0	1	2	1	0	1	0	0	0	0	0	0	0	0	0	0	0	0	8	0	1	0	0	3	0	0	0	4	0	7	0	6	3	1	0	1	4	0	0	0	0	0	0
26	I	conventional	14	21	0	0	0	0	4	0	0	1	0	0	0	0	0	0	0	0	0	0	0	1	1	0	1	0	1	3	1	1	2	0	0	1	0	1	2	0	0	0	1	0	0	0	0	0	0
27	J	organic	14	71	0	0	0	1	4	0	0	0	0	0	0	0	0	0	0	0	0	0	0	26	6	1	0	0	0	10	0	8	4	0	0	0	0	2	1	2	0	1	4	1	0	0	0	0	0
28	J	conventional	NA	NA	0	0	NA	NA	NA	NA	NA	NA	NA	NA	NA	NA	NA	NA	NA	NA	NA	NA	NA	NA	NA	NA	NA	NA	NA	NA	NA	NA	NA	NA	NA	NA	NA	NA	NA	NA	NA	NA	NA	NA	NA	NA	0	0	0
29	K	organic	2	4	2	2	0	0	0	0	0	0	0	0	0	0	0	0	0	0	0	0	0	0	2	0	0	0	0	0	0	2	0	0	0	0	0	0	0	0	0	0	0	0	0	0	0	0	0
30	K	conventional	12	24	0	0	0	1	6	0	0	0	0	0	0	0	0	0	0	0	0	0	0	0	0	0	0	0	4	1	0	1	1	0	0	1	1	1	2	3	0	0	2	0	0	0	0	0	0
31	L	organic	1	1	4	4	0	0	0	0	0	0	0	0	0	0	0	0	0	0	0	0	0	0	0	0	0	0	0	0	0	1	0	0	0	0	0	0	0	0	0	0	0	0	0	0	0	0	0
32	L	conventional	6	13	1	3	0	0	0	0	0	0	0	0	0	0	1	0	0	0	0	0	0	0	0	0	0	1	0	1	0	0	7	0	0	0	0	0	2	0	0	1	0	0	0	0	0	0	0
33	M	organic	9	23	0	0	0	0	0	0	0	0	0	3	1	0	0	0	0	0	0	0	0	2	11	0	1	0	0	2	0	0	1	0	0	1	0	0	1	0	0	0	0	0	0	0	0	0	0
34	M	conventional	7	15	0	0	0	0	1	0	0	0	0	0	0	1	0	0	0	0	0	0	0	0	0	0	0	0	0	2	0	8	0	0	0	1	0	0	1	0	0	0	1	0	0	0	0	0	0
35	N	organic	18	59	1	10	0	3	6	0	0	1	0	0	0	0	0	0	0	1	5	2	0	0	9	0	2	0	1	4	0	0	6	4	0	6	0	1	5	1	0	1	0	1	0	0	0	0	0
36	N	conventional	16	58	1	5	0	0	8	0	0	0	0	0	0	0	0	1	0	0	4	0	1	7	3	0	2	0	1	3	1	2	9	0	0	0	0	2	5	5	0	0	4	0	0	0	0	0	0
37	O	organic	15	45	1	2	0	2	4	2	0	2	0	1	0	1	0	0	0	0	4	1	0	0	6	0	2	0	0	0	0	0	0	0	0	1	0	0	11	3	0	0	0	3	2	0	0	0	0
38	O	conventional	11	27	0	0	0	0	2	0	0	2	0	0	0	0	0	0	0	0	3	0	0	0	6	0	1	0	0	0	1	0	2	0	0	2	0	0	0	6	0	0	0	1	1	0	0	0	0
39	P	organic	6	26	1	1	0	0	0	0	0	0	0	1	0	0	0	0	0	0	0	0	0	1	5	0	1	0	0	1	0	0	0	0	0	0	0	0	0	17	0	0	0	0	0	0	0	1	0
40	P	conventional	11	63	0	0	0	0	15	0	0	0	0	0	0	0	0	0	0	0	0	0	0	1	7	0	0	0	2	2	0	0	20	0	1	5	0	0	4	3	0	0	3	0	0	0	0	0	0
[truncated: 13 more columns]

## Sheet: EnvironmentalData
Site_ID	Block	Management	veg_height	flower_density	flower_specnr	veg_cover	PPTreatments	annual_perc	herb_perc	perennial_perc	vine_perc	woody_perc	SNH_perc	herb_md	woody_md	SNH_md	Latitude	Longitude
11	A	organic	22.33	691	3.4	79.6	12	7.7	4.9	3.4	47.6	8	12.9	140.5	23	23	49.9673	8.0719
12	A	conventional	11.9	12.6	1.3	64.17	12	2.4	3.6	1.8	39.5	5	8.6	57.6	189.1	57.6	49.9676	8.06752
13	B	organic	18.9	136.58	3.2	76.7	16	3.3	17.1	1.8	11.6	28.1	45.2	18.1	9	9	49.9608	8.0268
14	B	conventional	17.6	48.3	2.1	88.3	12	3.6	14.7	2.6	8.4	25.3	40	10.2	9.4	9.4	49.9606	8.02429
15	C	organic	18	555.6	3	73.92	16	10.5	9.6	10.4	25.7	8.5	18.1	129.4	98.6	98.6	49.9541	8.00581
16	C	conventional	9	114	2.2	76.25	12	11.2	9.9	10.7	27.7	8.8	18.7	137.5	28	28	49.954	8.00486
17	D	organic	16.3	438.58	2.25	73.75	16	13	10	5.5	59.7	7.7	17.7	3.1	220.9	3.1	49.9488	7.98934
18	D	conventional	7.5	2.92	0.25	76.7	12	8	8.3	7.3	65.6	7.7	16	181.1	302.5	181.1	49.9457	7.99456
19	F	organic	22.83	76.8	2.75	72.5	16	8.7	12.3	5.8	12.8	40.6	52.9	22.4	28.2	22.4	49.9472	8.02454
20	F	conventional	14.8	92.3	1.25	93.75	13	7.3	12.4	6.9	14.3	33.6	46	8.5	12.8	8.5	49.9476	8.02124
21	G	organic	14.08	82.25	2.75	77.5	14	29.7	14.7	1.6	33	17.3	32	31	21.5	21.5	49.9204	7.98594
22	G	conventional	10.17	33.1	1.8	73.75	12	28.7	14.7	1.5	34.4	17	31.7	28.6	25	25	49.9199	7.98609
23	H	organic	16.92	35.6	1.92	71.67	14	25.2	7.8	0.5	42.5	22.2	30	35.4	24.5	24.5	49.8936	7.98715
24	H	conventional	11.25	136.75	1.5	77.92	12	14	11.9	0.3	56.1	14	25.9	75.8	100.4	75.8	49.894	7.98021
25	I	organic	15.2	108.83	1.75	83.3	14	17.8	6.9	0.3	36.1	35.3	42.2	69	24.7	24.7	49.885	7.99688
26	I	conventional	9.08	46.4	1.4	65.3	10	16.7	6.8	0.4	38	34.5	41.3	40.5	15.3	15.3	49.885	7.99612
27	J	organic	11.2	150	3	52.5	14	35.5	12.8	0.8	33.3	12.2	25	10	41.8	10	49.8792	8.02463
28	J	conventional	6.8	61.83	1.75	53.4	11	42	12	0.8	28.9	11.7	23.7	54.6	69.6	54.6	49.8807	8.02535
29	K	organic	21.2	48.9	1.8	70.4	16	30.1	8.1	2.1	27	17.9	26	14.7	28.9	14.7	49.8957	8.07081
30	K	conventional	12.2	42.75	2.08	73.33	9	26.2	8.3	2.1	28.3	17.5	25.8	38.8	40.5	38.8	49.8967	8.07161
31	L	organic	16.2	39.3	1.2	91.67	16	28.5	11	1.4	25.1	7.9	18.9	14.8	12.6	12.6	49.8899	8.09093
32	L	conventional	8.25	12.4	0.75	72.1	11	26.7	10.6	1.5	25.2	8.4	19	12.3	93	12.3	49.8891	8.09009
33	M	organic	18.5	104.2	1.9	78.75	14	31.3	5.3	0.3	55.1	5.5	10.8	36.4	26.9	26.9	49.9046	8.09503
34	M	conventional	10.25	48.58	1.75	82.5	9	29.7	5.5	0.3	56.1	5.4	10.9	59.6	37.3	37.3	49.9042	8.09459
35	N	organic	11.92	228.4	1.75	77.9	17	16.9	10.2	0.8	49.8	10.7	20.9	102.2	117.4	102.2	49.8726	8.30617
36	N	conventional	10	19.75	1.5	59.7	12	17.5	10.2	0.8	49.4	10.6	20.8	105.1	101.6	101.6	49.8727	8.30607
37	O	organic	12.9	43.25	1.5	70	17	19.5	2.4	0.3	63	5.2	7.6	159.1	111.4	111.4	49.889	8.32804
38	O	conventional	11.8	31	1.75	83.75	9	18.7	2.2	0.3	63	5.2	7.4	152.1	95.5	95.5	49.889	8.32834
39	P	organic	7	87.25	0.92	47.5	17	1.3	4.9	0.1	30.1	16.4	21.3	21.8	12.1	12.1	49.8633	8.34319
40	P	conventional	8.1	5.3	0.415	56.92	12	1.3	5.8	0.1	33.7	16.3	22.1	38.7	78.5	38.7	49.8627	8.34197

## Sheet: Meta
Year of the study:		2016
Short description:		Trap nest and pitfall study in a paired experimental setup with 15 organically and 15 conventionally managed sites. For a detailed method description, see Uzman et al. (2020) and Kolb et al. (2020)
			Variable type
General:	Site_ID	Unique number for each site	Factor, [1-30]
	Block	Unique letter for each vineyard pair	Factor, [A-P]
	Farming_Type	Categorical variable: organic or conventional	Factor, [organic, conventional]
Response Variables:	CarSpecNr	Carabid species number per site	Numeric, whole numbers
	CarAbu	Number of carabid individuals per site	Numeric, whole numbers
	WaspSpecNr	Cavity-nesting wasp species numbers per site	Numeric, whole numbers
	WaspAbu	Cavity-nesting wasp abundance per site. Abundances are defined as sum of nesting tubes, not brood cells	Numeric, whole numbers
	Column H:BK	Abundances of single species, Full species names see next Tab	Numeric, whole numbers
Environmental variables:	veg_height	Mean vegetation height in the inter-rows [cm]	Numeric, decimal numbers
	flower_density	Mean number of flowers per m² in the inter-rows	Numeric, decimal numbers
	flower_specnr	Mean number of flowering morphospecies per m² in the inter-rows	Numeric, decimal numbers
	veg_cover	Mean estimated vegetation cover in the inter-rows [%]	Ratio, [0 - 100%]
	PPTreatments	Number of plant protection treatments for the vegetation period 2016. The value represents the number of spraying events, encompassing insecticide, herbicide, organic and anorganic fungicide as well als plant strengthener application	Numeric, whole numbers
	annual_perc	Covered area by annual crops in a radius of 1000 m [%]	Ratio, [0 - 100%]
	herb_perc	Covered area by herbaceous elements in a radius of 1000 m [%]	Ratio, [0 - 100%]
	perennial_perc	Covered area by perennial crops in a radius of 1000 m [%]	Ratio, [0 - 100%]
	vine_perc	Covered area by vineyards in a radius of 1000 m [%]	Ratio, [0 - 100%]
	woody_perc	Covered area by woody elements in a radius of 1000 m [%]	Ratio, [0 - 100%]
	SNH_perc	Addition of herb_perc and woody_perc, all semi-natural elements [%]	Ratio, [0 - 100%]
	herb_md	Minimal distance from vineyard center to the next herbaceaous element [m]	Numeric, decimal numbers
	woody_md	Minimal distance from vineyard center to the next woody element [m]	Numeric, decimal numbers
	SNH_md	Minimal distance from vineyard center to the next SNH element (woody OR herbaceous) [m]	Numeric, decimal numbers
	Latitude		Coordinates
	Longitude		Coordinates

## Sheet: SpeciesNames
Abbreviation	Full Name	Group
Acu_int	Acupalpus interstitialis	Carabid beetles
Acu_mer	Acupalpus meridianus	Carabid beetles
Ama_aen	Amara aenea	Carabid beetles
Ama_ant	Amara anthobia	Carabid beetles
Ama_con	Amara cf. Convexior	Carabid beetles
Ama_fam	Amara familiaris	Carabid beetles
Ama_lun	Amara lunicollis	Carabid beetles
Ama_ova	Amara ovata	Carabid beetles
Ama_sim	Amara similata	Carabid beetles
Anc_dor	Anchomenus dorsatus	Carabid beetles
Ani_bin	Anisodactylus binotatus	Carabid beetles
Asa_fla	Asaphidion flavipes	Carabid beetles
Bad_bul	Badister bullatus	Carabid beetles
Bad_sod	Badister sodalis	Carabid beetles
Bem_lam	Bembidion lampros	Carabid beetles
Bem_pro	Bembidion properans	Carabid beetles
Bem_qua	Bembidion quadrimaculatum	Carabid beetles
Bra_cre	Brachinus crepitans	Carabid beetles
Bra_exp	Brachinus explodens	Carabid beetles
Cal_lun	Callistus lunatus	Carabid beetles
Car_aur	Carabus auratus	Carabid beetles
Car_mon	Carabus monilis	Carabid beetles
Cic_cam	Cicindela campestris	Carabid beetles
Har_aff	Harpalus affinis	Carabid beetles
Har_atr	Harpalus atratus	Carabid beetles
Har_dim	Harpalus dimidiatus	Carabid beetles
Har_dis	Harpalus distinguendus	Carabid beetles
Har_pum	Harpalus pumilus	Carabid beetles
Har_sub	Harpalus subcylindricus	Carabid beetles
Har_tar	Harpalus tardus	Carabid beetles
Lei_spi	Leistus spinibaris	Carabid beetles
Mic_mau	Microlestes maurus	Carabid beetles
Mic_min	Microlestes minutulus	Carabid beetles
Neb_bre	Nebria brevicollis	Carabid beetles
Neb_sal	Nebria salina	Carabid beetles
Not_aes	Notiophilus aestuans	Carabid beetles
Oph_azu	Ophonus azureus	Carabid beetles
Pla_dor	Platynus dorsalis	Carabid beetles
Poe_cup	Poecilus cupreus	Carabid beetles
Sem_sig	Semiophonus signaticornis	Carabid beetles
All_rossi	Allodynerus rossii	Cavity-nesting wasps
Anc_antil	Ancistrocerus antilope	Cavity-nesting wasps
Anc_clari	Ancistrocerus claripennis	Cavity-nesting wasps
Anc_gazel	Ancistrocerus gazella	Cavity-nesting wasps
Anc_nigri	Ancistrocerus nigricornis	Cavity-nesting wasps
Anc_parie	Ancistrocerus parietinus	Cavity-nesting wasps
Dip_spec	Dipogon sp.	Cavity-nesting wasps
Dip_subin	Dipogon subintermedium	Cavity-nesting wasps
Dis_doufo	Discoelius doufourii	Cavity-nesting wasps
Dis_zonal	Discoelius zonalis	Cavity-nesting wasps
Mic_longi	Microdynerus longicollis	Cavity-nesting wasps
Mic_timid	Microdynerus timidus	Cavity-nesting wasps
Try_atten	Trypoxylon attentuatum-deceptorium	Cavity-nesting wasps
Try_clavi	Trypoxylon clavicerum	Cavity-nesting wasps
Try_figul	Trypoxylon figulus	Cavity-nesting wasps
Try_spec	Trypoxylon sp.	Cavity-nesting wasps
